# Supplementary material for: Significant reduction of PM 2.5 in eastern China due to regional-scale emission control: Evidences from the SORPES station, 2011–2018
Source: Copernicus journal article supplement (doi:10.5194/acp-2019-407), 2019-05-14
Supplement: Supplementary file 1 [file acp-2019-407-supplement.pdf]

## Supplementary Information

**Table S1.** Instrumentation, observational period and data coverage for main parameters measured at the SORPES station.

| Parameter                                                                                                         | Instruments                         | Resolution | Period                              | Data coverage |
|-------------------------------------------------------------------------------------------------------------------|-------------------------------------|------------|-------------------------------------|---------------|
| PM <sub>2.5</sub>                                                                                                 | Thermo Fisher Scientific SHARP 5030 | 5 min      | August 2011-July 2018               | 97.8%         |
| SO <sub>2</sub>                                                                                                   | Thermo Fisher Scientific TEI-43i    | 5 min      | August 2011-July 2018               | 98.3%         |
| NO <sub>2</sub> , NO <sub>x</sub>                                                                                 | Thermo Fisher Scientific TEI-42i    | 5min       | August 2011-July 2018               | 93.9%         |
| BC                                                                                                                | Magee Scientific AE31               | 5min       | May 2013-July 2018                  | 91.9%         |
| SO <sub>4</sub> <sup>2-</sup> , NO <sub>3</sub> <sup>-</sup> , NH <sub>4</sub> <sup>+</sup> , K <sup>+</sup> etc. | Metrohm, MARGA                      | 1 hr       | May-June 2012<br>May 2013-July 2018 | 83.7%         |

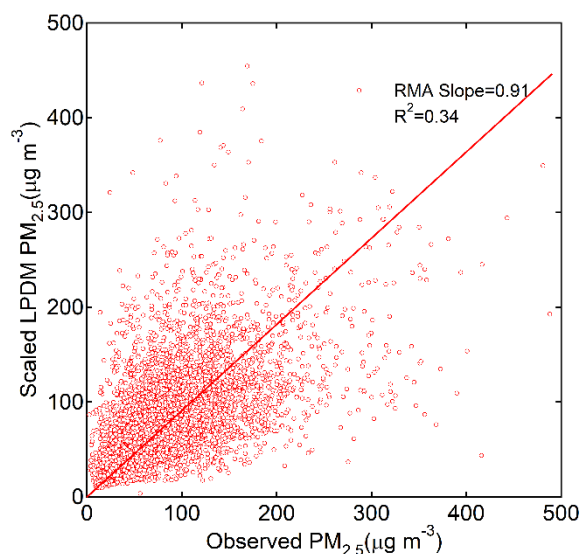

**Figure S1.** Scatter plot of scaled LPDM simulated PM<sub>2.5</sub> versus observations at the SORPES station for the period of November-January during 2013-2018. Note: Here the “scaled” means for each month the simulation result was adjusted to have the medium value matched with observation.
